# Supplementary material for: The Use of an Invasive Species Habitat by a Small Folivorous Primate: Implications for Lemur Conservation in Madagascar
Source: PLoS One. 2015 Nov 4;10(11):e0140981. doi: 10.1371/journal.pone.0140981 (PMC4633110; doi:10.1371/journal.pone.0140981)
Supplement: S1 Table — (XLSX) [file pone.0140981.s001.xlsx]

## Sheet: S1 Table
S1 Table: Monthly means for seasonal variables and broad-level activity categories in different habitats for three Hapalemur meridionalis groups at Mandena, Madagascar (2013)
2013		Forest			Swamp			Melaleuca			Seasonal factors
Month	Group	Rest	Feed	Travel	Rest	Feed	Travel	Rest	Feed	Travel	Temp (mean)	Rain (total)	Day length (mean)
Jan	1	0.378913	0.209226	0.0724876	0.108731	0.0247117	0.0164745	0.0313015	0.0790774	0.0329489	26.74	194.818	13.52
Feb	1	0.441516	0.352554	0.0807249	0.0461285	0.0115321	0.00329489	0.00494234	0.00494234	0.00988468	24.95	820.166	12.93
Mar	1	0.276771	0.260297	0.0741351	0.0906096	0.0214168	0.014827	0.0939044	0.0939044	0.0280066	24.96	251.968	12.22
Apr	1	0.23888	0.0971993	0.0724876	0.14827	0.0395387	0.0115321	0.172982	0.151565	0.0444811	23.66	152.908	11.47
May	1	0.265239	0.144975	0.0642504	0.0527183	0.0543657	0.014827	0.130148	0.209226	0.0230643	20.67	241.554	10.87
Jun	1	0.319605	0.235585	0.0576606	0.00164745	0.0230643	0	0.0576606	0.233937	0.014827	19.09	137.922	10.34
Jul	1	0.186161	0.237232	0.0510708	0.00494234	0.0230643	0.00164745	0.189456	0.273476	0.0362438	18.49	90.678	10.72
Aug	1	0.197694	0.270181	0.0658979	0	0	0.00164745	0.176277	0.228995	0.0164745	19.21	207.772	11.23
Sep	1	0.308072	0.433278	0.108731	0.0181219	0.00988468	0.00658979	0.0593081	0.0345964	0.00494234	21.88	13.462	11.93
Oct	1	0.250412	0.250412	0.0873147	0.0675453	0.0214168	0.00658979	0.120264	0.192751	0.0181219	21.94	65.82	12.68
Nov	1	0.395387	0.306425	0.0560132	0.0658979	0.00988468	0.00329489	0.00329489	0.0593081	0.00823723	24.28	224.282	13.35
Dec	1	0.411862	0.449753	0.0708402	0.0115321	0.0362438	0.0164745	0	0	0	24.78	233.172	13.7
Jan	2	0.444811	0.301483	0.112026	0.0708402	0.00823723	0.0197694	0	0	0	26.74	194.818	13.52
Feb	2	0.345964	0.38715	0.123558	0.0131796	0.0197694	0.00823723	0	0	0	24.95	820.166	12.93
Mar	2	0.499176	0.243822	0.120264	0.0214168	0.0494234	0.00823723	0.00164745	0.00823723	0	24.96	251.968	12.22
Apr	2	0.365733	0.215815	0.120264	0.07743	0.113674	0.0313015	0.00164745	0.0115321	0.00329489	23.66	152.908	11.47
May	2	0.425041	0.354201	0.0823723	0.0164745	0.0691928	0.014827	0.00164745	0.0164745	0	20.67	241.554	10.87
Jun	2	0.429984	0.431631	0.0609555	0.00329489	0.0164745	0.00164745	0.00658979	0.029654	0.00823723	19.09	137.922	10.34
Jul	2	0.283361	0.589786	0.0609555	0	0.0197694	0.00164745	0	0	0	18.49	90.678	10.72
Aug	2	0.397035	0.514003	0.0642504	0	0.00164745	0	0.00164745	0.00988468	0	19.21	207.772	11.23
Sep	2	0.314662	0.499176	0.0593081	0.00658979	0.00329489	0.00494234	0	0.0362438	0.00329489	21.88	13.462	11.93
Oct	2	0.270181	0.377265	0.0642504	0.00329489	0.0181219	0.00329489	0.00658979	0.014827	0.00329489	21.94	65.82	12.68
Nov	2	0.448105	0.418451	0.0955519	0.00494234	0.00988468	0.00658979	0.00329489	0.0263591	0.00658979	24.28	224.282	13.35
Dec	2	0.388797	0.520593	0.105437	0	0.0115321	0.00988468	0	0	0	24.78	233.172	13.7
Jan	4	0.0428336	0.0181219	0.014827	0.16804	0.0247117	0.0461285	0.0115321	0.0971993	0.0115321	26.74	194.818	13.52
Feb	4	0.179572	0.0807249	0.0593081	0	0	0	0.00658979	0	0.00494234	24.95	820.166	12.93
Mar	4	0.197694	0.0971993	0.0576606	0.224053	0.140033	0.0724876	0.0494234	0.0971993	0.0329489	24.96	251.968	12.22
Apr	4	0.0428336	0.0164745	0.0164745	0.301483	0.166392	0.0823723	0.00329489	0.0181219	0.014827	23.66	152.908	11.47
May	4	0.103789	0.0642504	0.0362438	0.202636	0.143328	0.0609555	0.0527183	0.187809	0.0214168	20.67	241.554	10.87
Jun	4	0.0757825	0.0214168	0.014827	0.23888	0.108731	0.0411862	0.115321	0.5486	0.0214168	19.09	137.922	10.34
Jul	4	0.0395387	0.0560132	0.0181219	0.110379	0.146623	0.0313015	0.107084	0.484349	0.0280066	18.49	90.678	10.72
Aug	4	0.247117	0.092257	0.0428336	0.128501	0.24547	0.0461285	0.00164745	0.0395387	0.00988468	19.21	207.772	11.23
Sep	4	0.243822	0.07743	0.0527183	0.0856672	0.177924	0.0527183	0.014827	0.135091	0.0131796	21.88	13.462	11.93
Oct	4	0.0131796	0.00494234	0.00988468	0.192751	0.194399	0.0543657	0.156507	0.359143	0.0345964	21.94	65.82	12.68
Nov	4	0.375618	0.275124	0.0906096	0.0790774	0.0461285	0.00494234	0.0247117	0.159802	0.0197694	24.28	224.282	13.35
Dec	4	0.23229	0.281713	0.0642504	0.0378913	0.0494234	0.0280066	0.105437	0.24547	0.0329489	24.78	233.172	13.7
